# Supplementary material for: Tumour heterogeneity revealed by unsupervised decomposition of dynamic contrast-enhanced magnetic resonance imaging is associated with underlying gene expression patterns and poor survival in breast cancer patients
Source: Springer Nature journal article supplement (doi:10.1186/s13058-019-1199-8), 2019-10-17

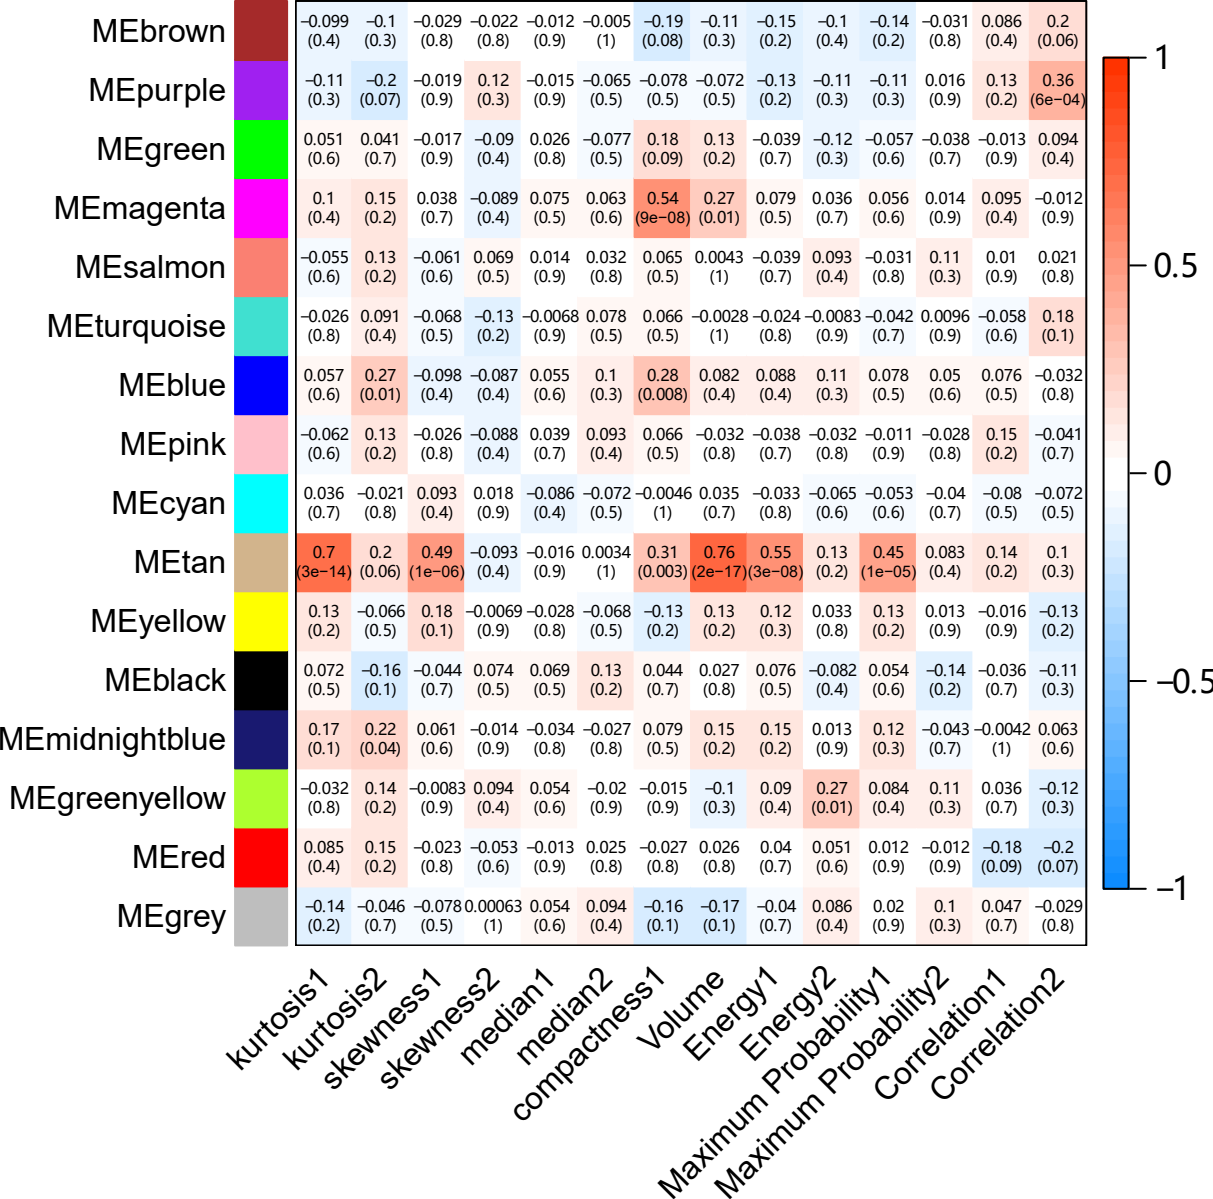

Supplement: MOESM2 [file 17284458]
